# Supplementary material for: Quantitative detection of Ag+ and cysteine using G-quadruplex–hemin DNAzymes
Source: Royal Society of Chemistry journal article supplement (doi:10.1039/b925168e), 2010-01-01
Supplement: b925168e.pdf [file b925168e.pdf]

## Quantitative detection of $\text{Ag}^+$ and cysteine using G-quadruplex-hemin DNazymes

De-Ming Kong,\* Li-Li Cai and Han-Xi Shen

### 1. CD spectra of the sensing systems in the presence of hemin

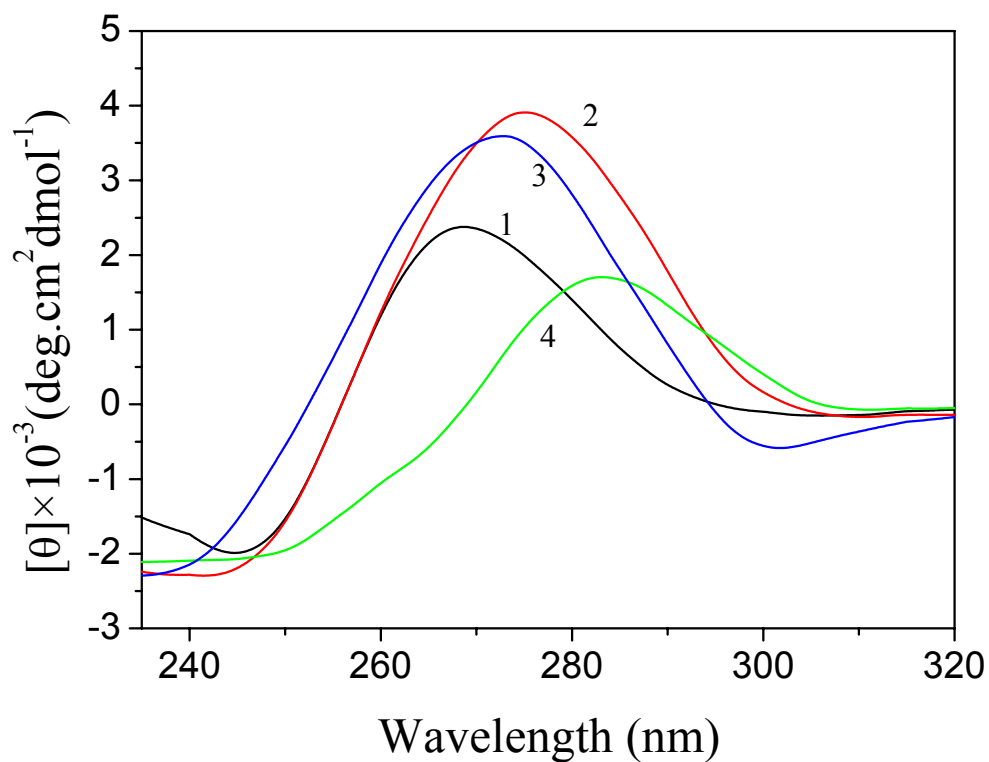

**Fig. S1** The CD spectra of Strand A + hemin (1), Strand A + Strand B + hemin (2), Strand A + Strand B +  $\text{Ag}^+$  + hemin (3) and Strand A + Strand B +  $\text{Ag}^+$  + Cys + hemin (4).

2. The effects of GSH and GSSG on Ag<sup>+</sup> detection.

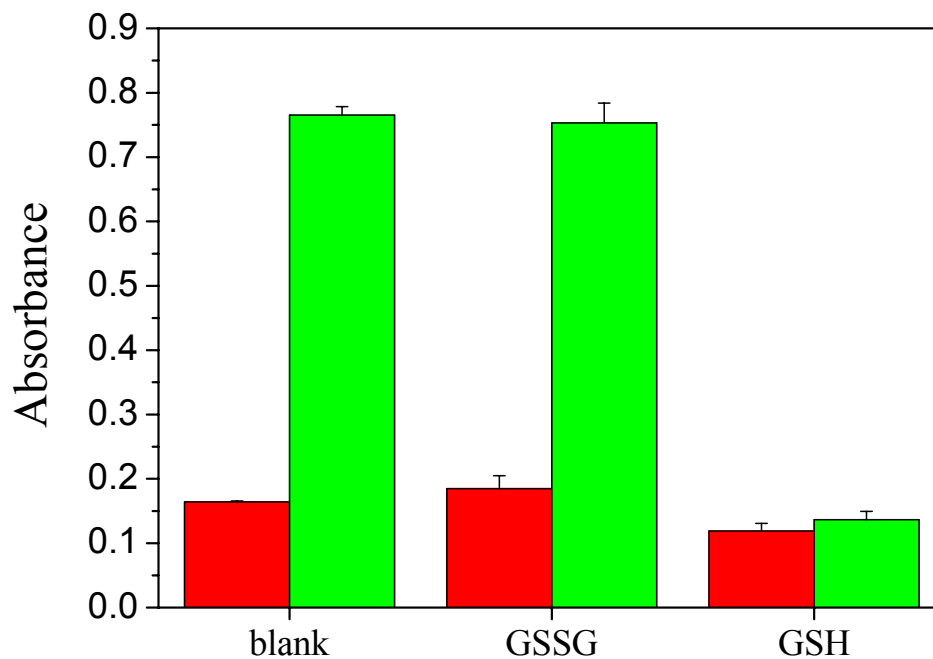

**Fig. S2** The effects of GSH and GSSG on Ag<sup>+</sup> detection. Red bars represent the absorption signals of the Ag<sup>+</sup>-sensing systems in the presence of 4 μM GSH or GSSG. Green bars represent the absorption signals of the sensing systems in the presence of 4 μM Ag<sup>+</sup> and 4 μM GSH (or GSSG). All experiments were performed in duplicate.
